# Supplementary material for: An epitope-specific chemically defined nanoparticle vaccine for respiratory syncytial virus
Source: PubMed Central journal article supplement (PMC8213762; doi:10.1038/s41541-021-00347-y), 2021-06-18

# An Epitope-Specific Chemically Defined Nanoparticle Vaccine for Respiratory Syncytial Virus

## Supplementary information

**Supplementary Figure 1. NMR studies of FslIm. A,** Chemical shift assignments for FslIm. **B,**

5 **Statistical analysis of structure calculations. C,** H $\alpha$  chemical shift deviations from random coil values, showing mostly negative values typical of helical secondary structure. **D,** 600 MHz  $^1\text{H}$  NMR spectrum of FslIm in H $_2\text{O}/\text{D}_2\text{O}$  (9:1), pH 5.0.

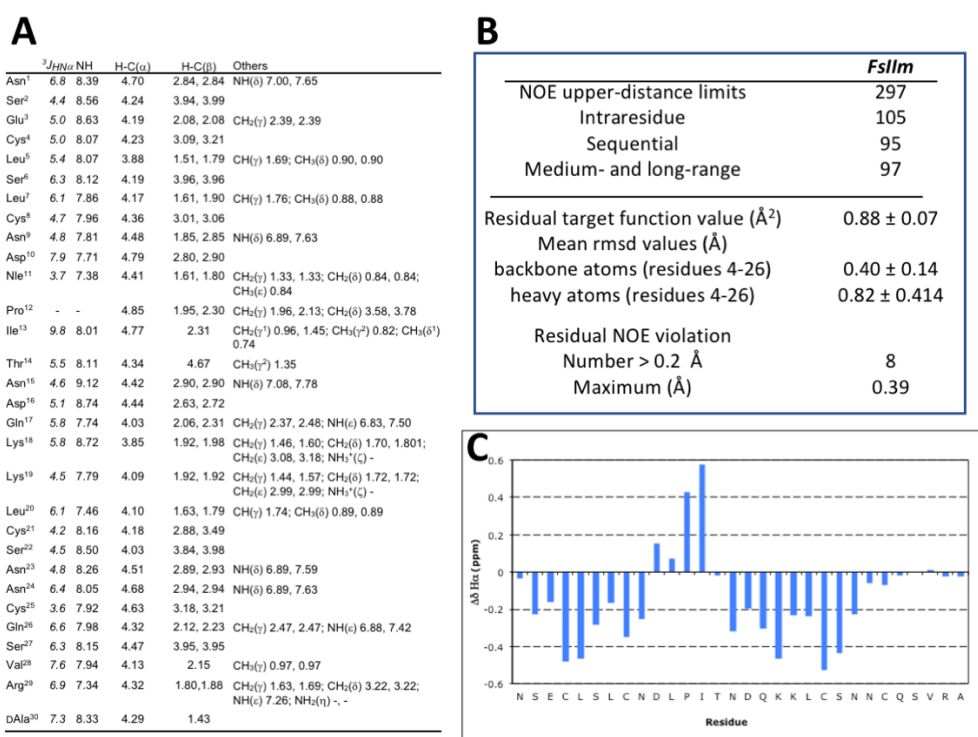

**Supplementary Figure 2. Synthesis of V-306.** The synthetic route to **V-306** (Figure 1) described

10 in the Methods section is shown.

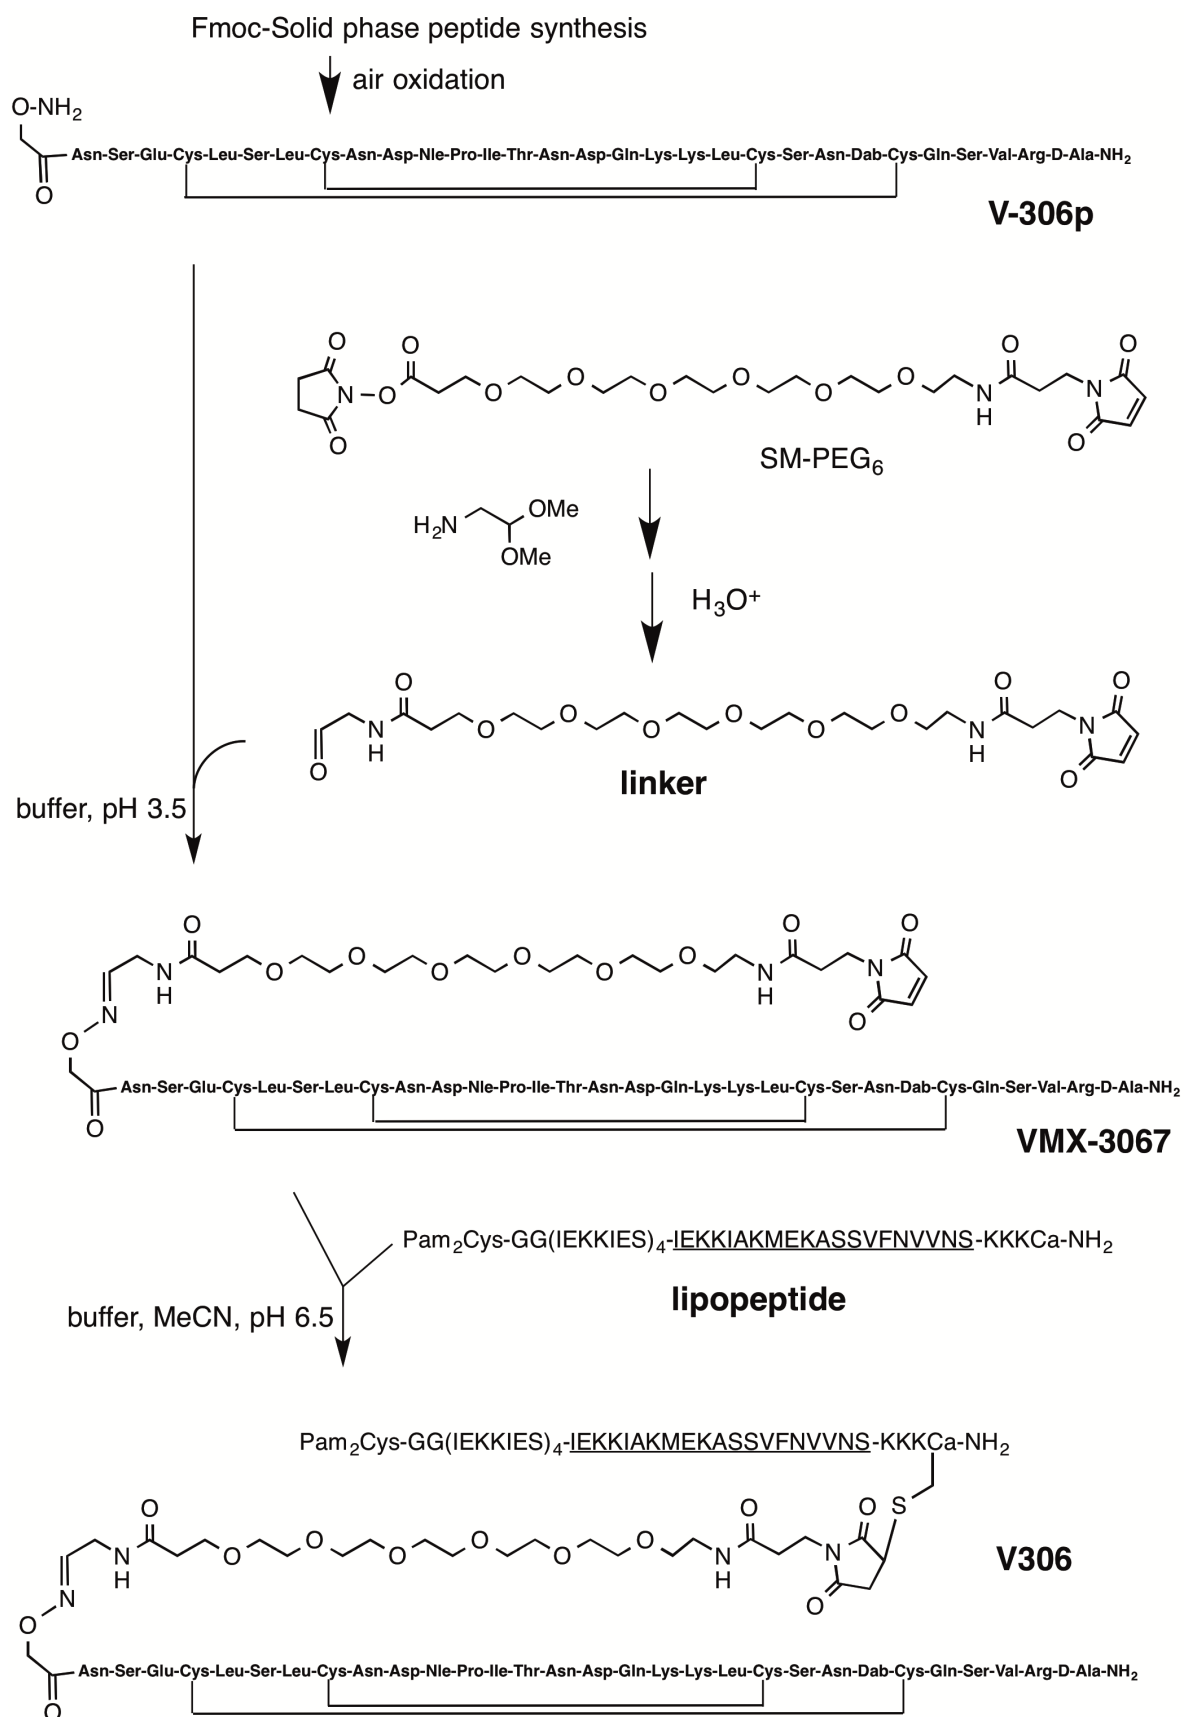

**Supplementary Figure 3. Analytical results for V-306.** *Top*, Analytical UPLC of V-306 (see Methods section for experimental details). *Bottom*, High resolution electrospray ionization (ESI)-MS of V-306.

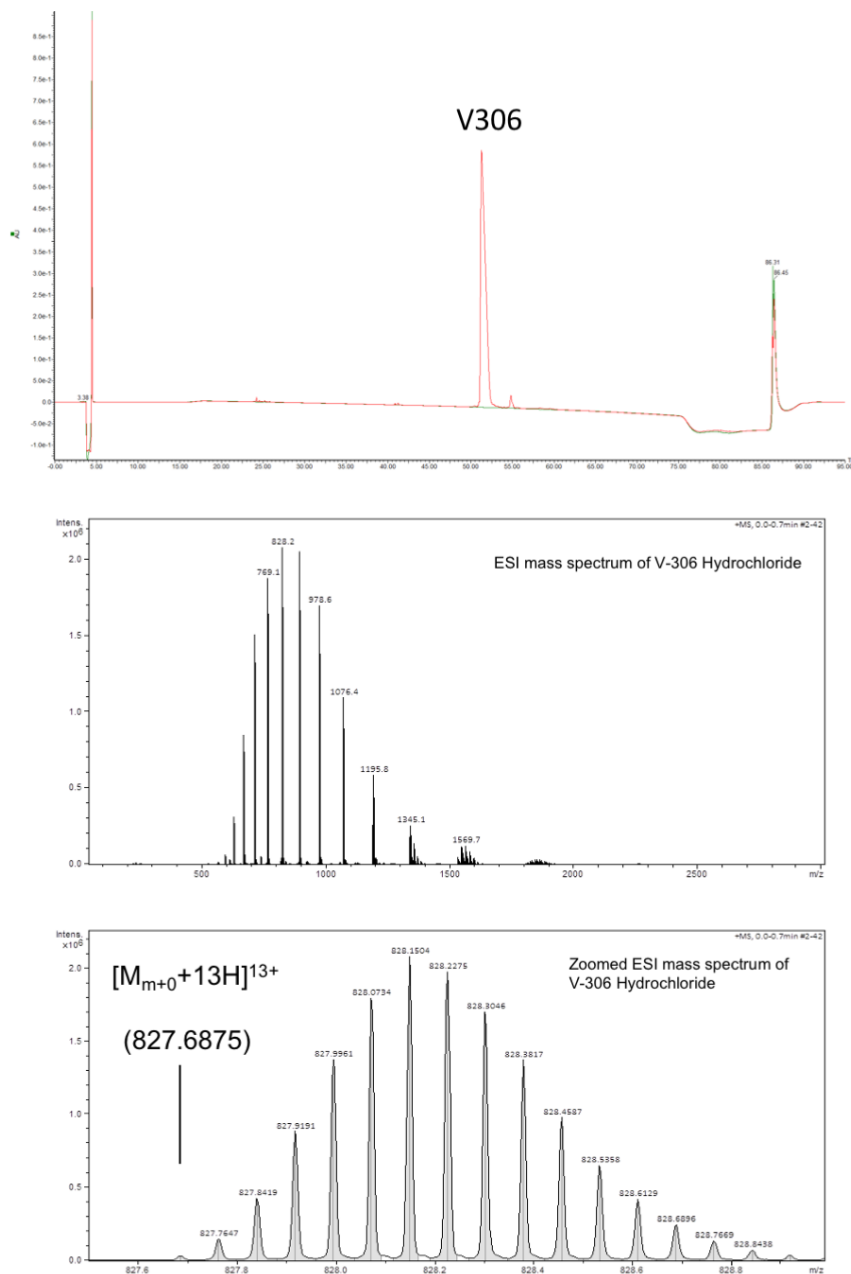

**Supplementary Figure 4. EM and DLS data for V-306.** **A**, Negative staining transmission electron micrograph of SVLPs formed by the **V-306** lipopeptide dissolved in tris(hydroxymethyl)amino-methane (Tris) buffer containing 0.9% NaCl, pH 7.4. Method: **V-306** in buffer was applied to glow discharged carbon-coated copper EM grid (400 mesh) and left for 50 s. Excess solution was removed with blotting paper, and then washed with 2 drops of water. The sample was stained with 2% uranyl acetate 3x for 15 min then air dried for 30 min. The sample was then examined by TEM. Scale bar 5x100 nm. **B**, **V-306** lipopeptide was dissolved in PBS (0.5 mg/mL) at pH 7.4, and analyzed in a Wyatt DynaPro DLS instrument at 25°C. Size distributions are shown by regularization as intensity distributions. The average radius, % polydispersity and polydispersity index (PDI) are given below.

**A**

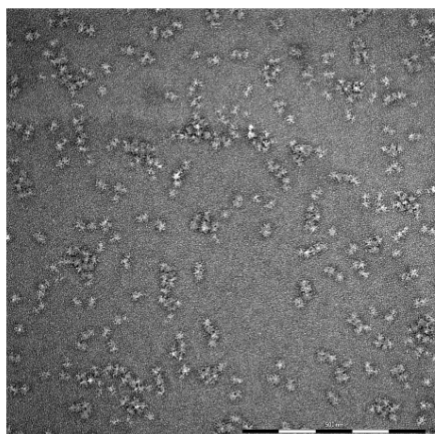

**B**

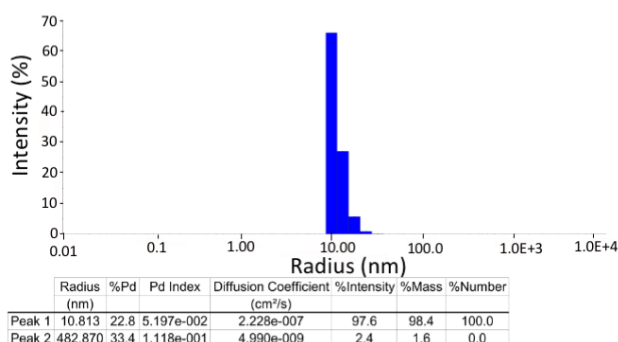

30

35

**Supplementary Figure 5. Determination of Abs in human sera recognizing V-306.** *Left*, Optimized ELISA calibration for determination of Abs in human sera that bind to peptide (**V-306p**), carrier+peptide (**V-306**) and lipopeptide carrier (shown in Supplementary Figure 2). *Right*, Ab titre in each of 20 different sera. For experimental details see Methods.

40

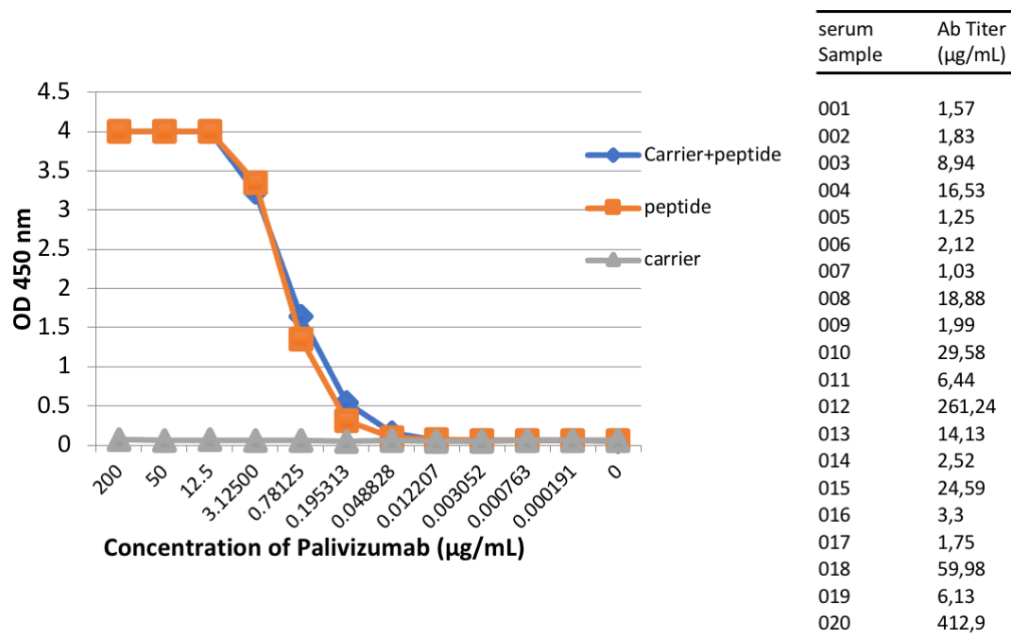

45

**Supplementary Figure 6. Representative histopathology pictures.** Each picture shows typical histopathology slides following immunizations with different doses of **V-306** (once with adjuvant), with FI-RSV and with PBS (negative control). Scale bar 500  $\mu$ m.

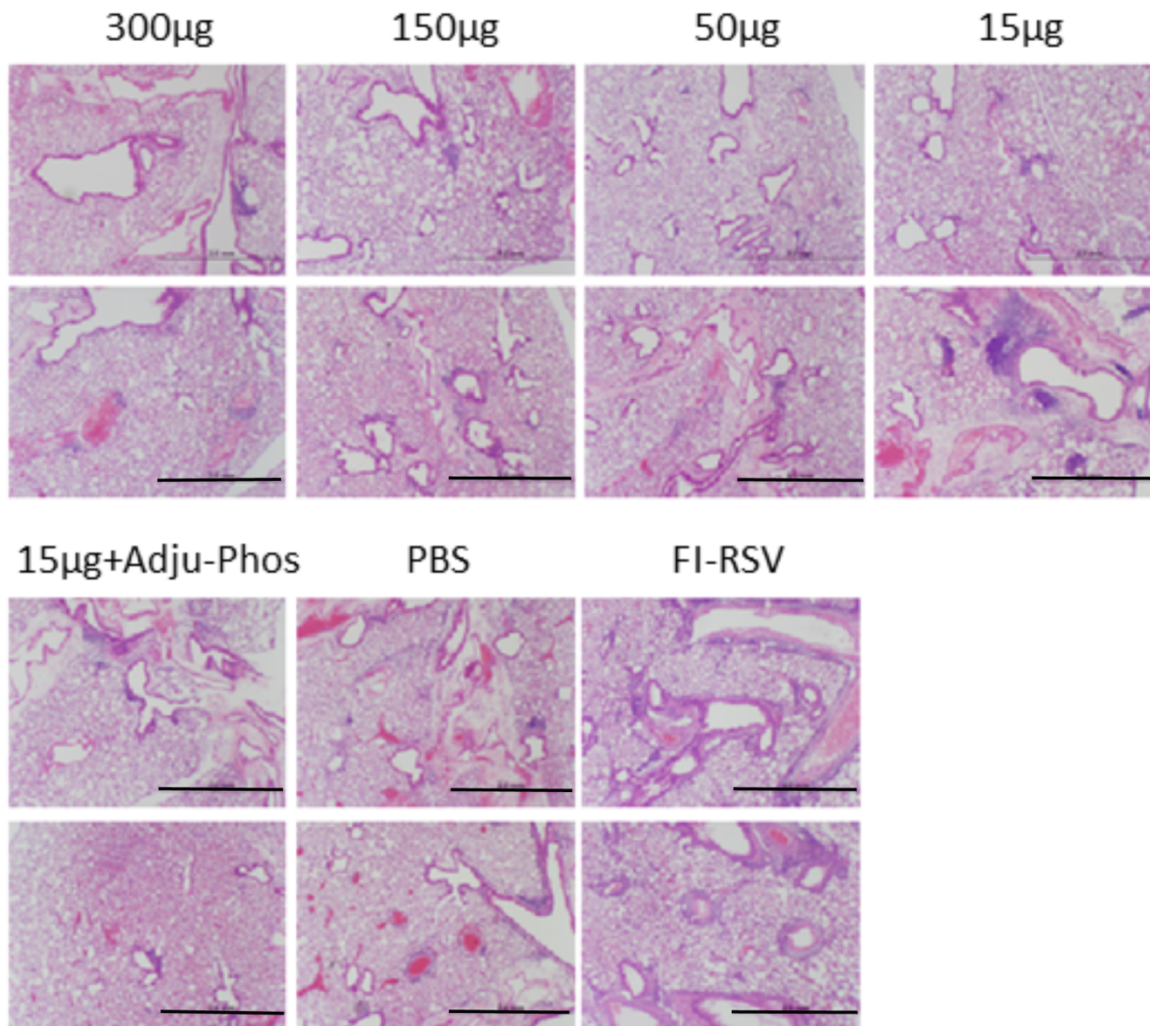

50

55

**Supplementary Figure 7. Nucleotide and deduced primary sequences of the VH and VL regions of mAb 10D11.** The predicted CDRs are underlined.

60 **VH domain**

Nt sequence

CAGGTGCAACTGAAGGAGTCAGGACCTGGCCTGGTGGCGCCCTCACAGAGCCTGTCCATTACCTGCA  
CTGTCTCTGGGTTCTCATTAACCAGCTATGATATAAGCTGGATTCGCCAGCCACCAGGAAAGGGTCT  
65 GGAGTGGCTTGGAATAATATGGAATGGTGGAGGCACAAATTATAATTCAGCTTTCATGTCCAGACTG  
AGCATCAACAAGGACAATCCAAGAGCCAAGTATTCTTAAAAATGAACAGTCTGCAAAGTATGATA  
CAGCCATATATTACTGTGTAAGAGGTGATTATGATTACGCCTGGTTTGATTACTGGGGCCAAGGGAC  
TCTGGTCACTGTCTCTGCA

70 Amino acid sequence

QVQLKESGPGLVAPSQLSITCTVSGFSLTSYDISWIRQPPGKGLEWLGIIWNGGGTNYNSAFMSRLSINK  
DNSKSQVFLKMNSLQDDTAIYYCVRGYDYAWFDYWGQGTLVTVSA

75

**VL domain**

Nt sequence

AACATTATGATGACACAGTCGCCATCATCTCTGACTGTGTCTGCAGGAGAAAAGGTCACTATGAGCT  
80 GTAAGTCCAGTCAAAGTGTTTTTATACGGTTCAAATCAGAAGAACTACTTGGCCTGGTACCAGCAGAA  
ACCAGGGCAGTCTCCTAAACTGCTGATCTACTGGGCATCCACTAGGGATTCTGGTGTCCCTGATCGCT  
TCACAGGCAGTGGATCTGGGACAGATTTACTCTTACCATCAGCAGTGTACAAGCTGAAGACCTGGC  
AGTTTATTATTGTCATCAATACCTCTTCTCGTGGACGTTCCGGTGGAGGCACCAAGCTGGAATCAAA

85 Amino acid sequence

NIMMTQSPSSLTVSAGEKVTMSCKSSQSVLYGSNQKNYLAWYQQKPGQSPKLLIYWASTRDSGVPDRF  
TGSGSGDFTLTISSVQAEDLAVYYCHQYLFSWTFGGGKLEIK

90

**Supplementary Figure 8. Determination of dissociation constants ( $K_D$ ) using Surface Plasmon**

**Resonance (SPR). A, For 10D11+FslIm.** Double referenced SPR sensorgram of interaction of

95 10D11 with **FslIm** at concentrations of 3, 6, 12, 24 and 48 nM, with single-cycle kinetic measurement (black) and 1+1 fit (red) using a 1:1 interaction model. **B, Palivizumab+FslIm.**

Double referenced SPR sensorgram of interaction of Palivizumab with **FslIm**. Sensorgrams (black) and fit (red) to a 1:1 binding model, for 8 injections of the peptide in duplicate at concentrations of 7.8, 15.6, 31.25, 62.5, 125, 250, 500 and 1000 nM.

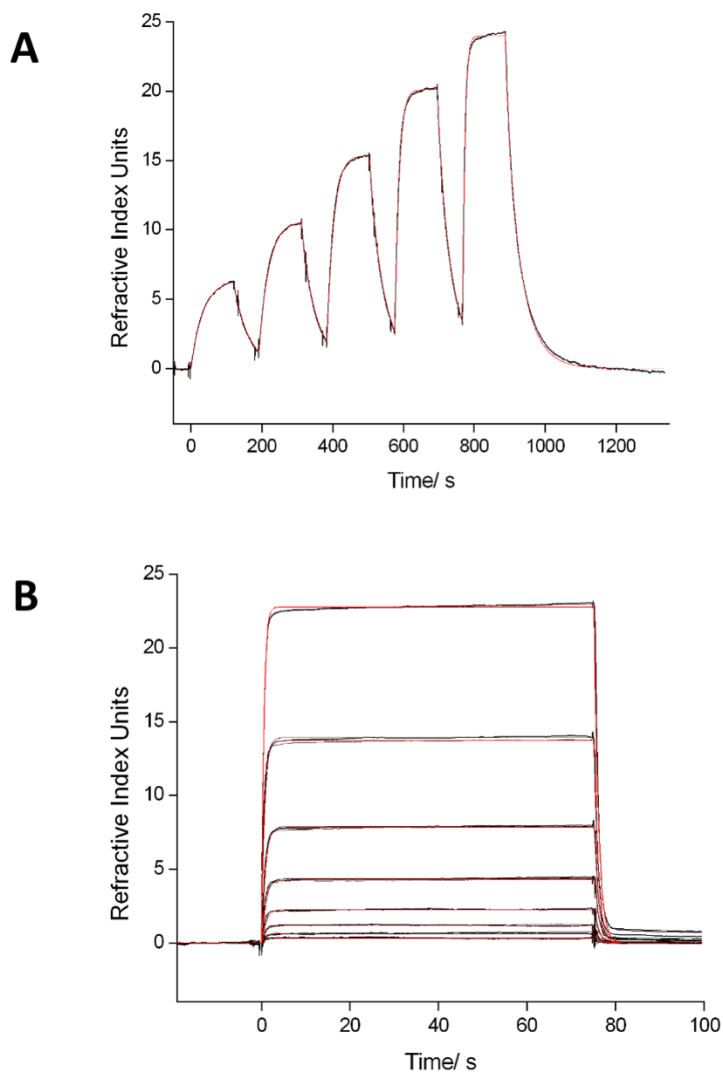

Supplement: 41541_2021_347_MOESM1_ESM.pdf [file 41541_2021_347_MOESM1_ESM.pdf]
